# Supplementary material
Source: MDPI journal article supplement (https://www.mdpi.com/1099-4300/23/9/1211)
Supplement: s1 [file s1]

A1

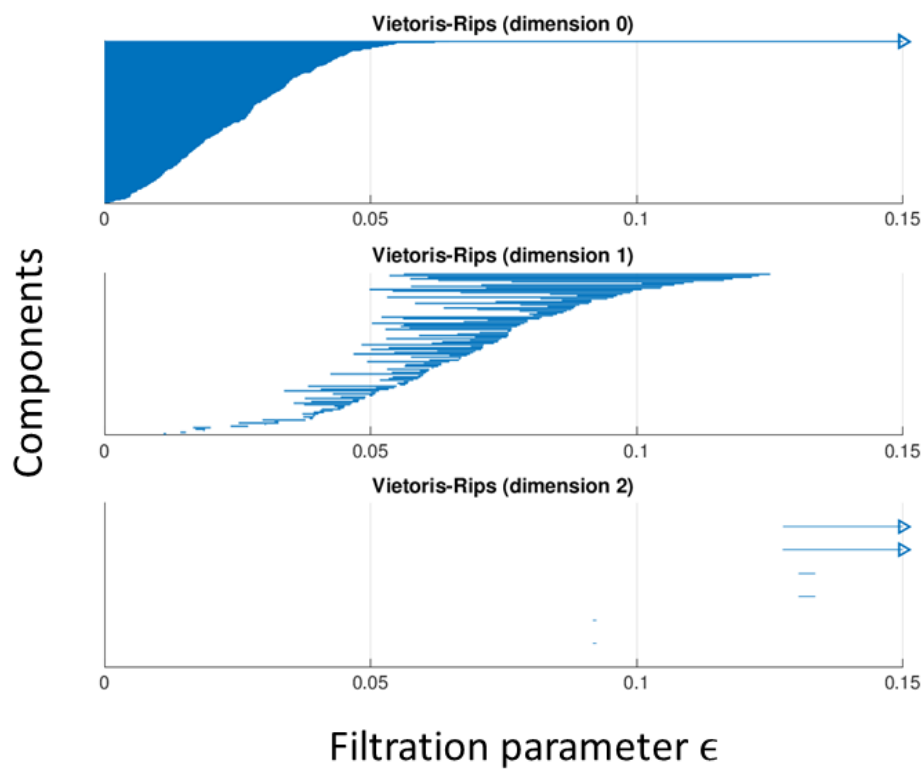

A2

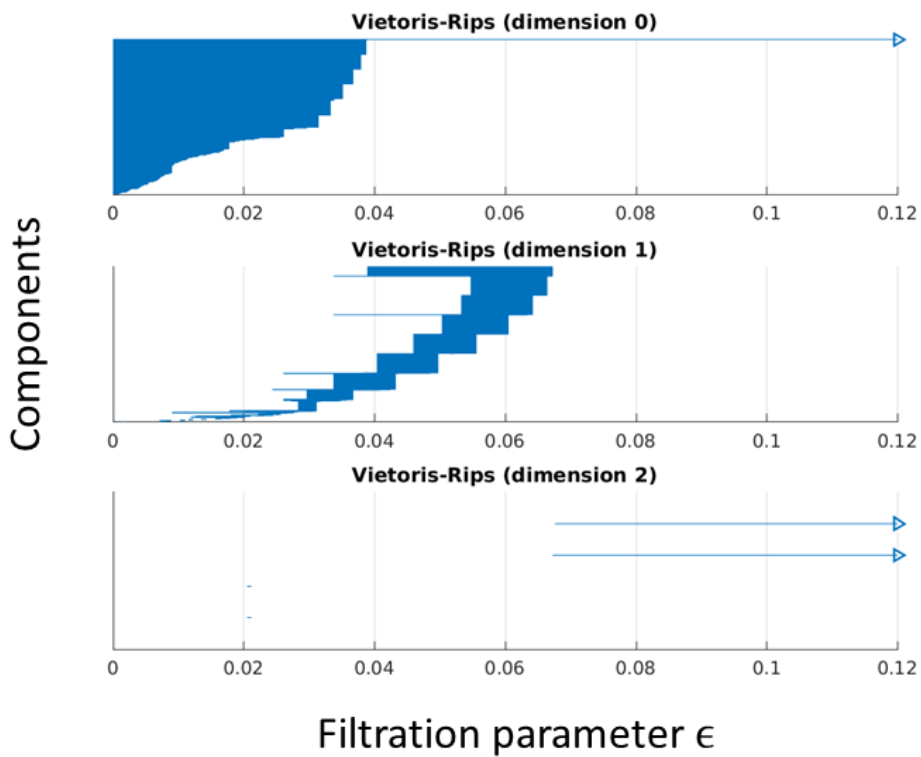

# A3

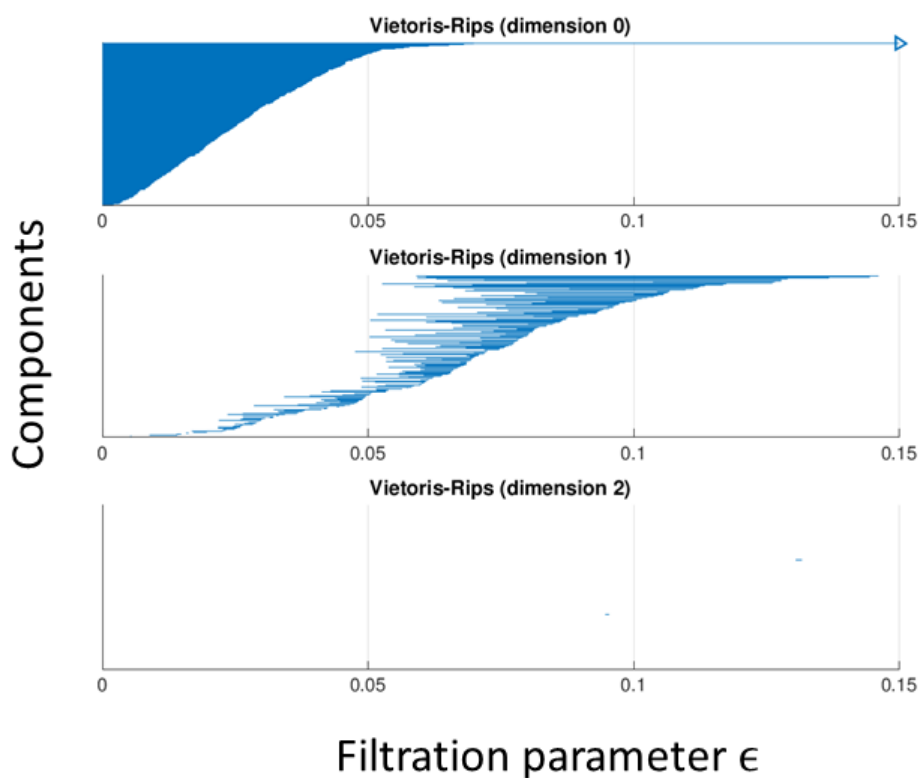

# A4

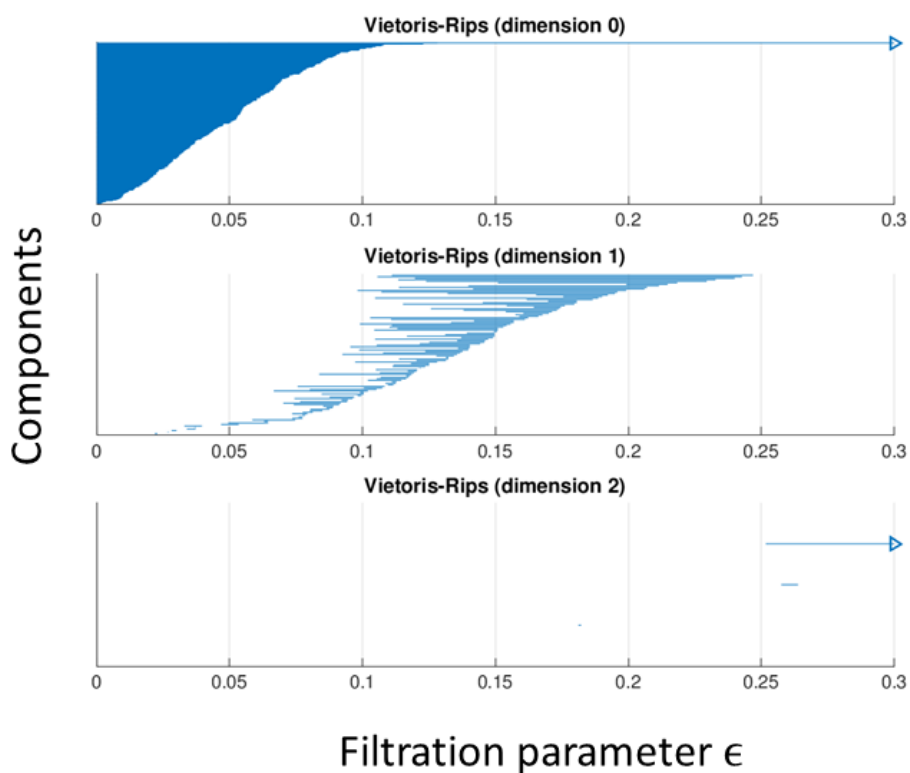

B1

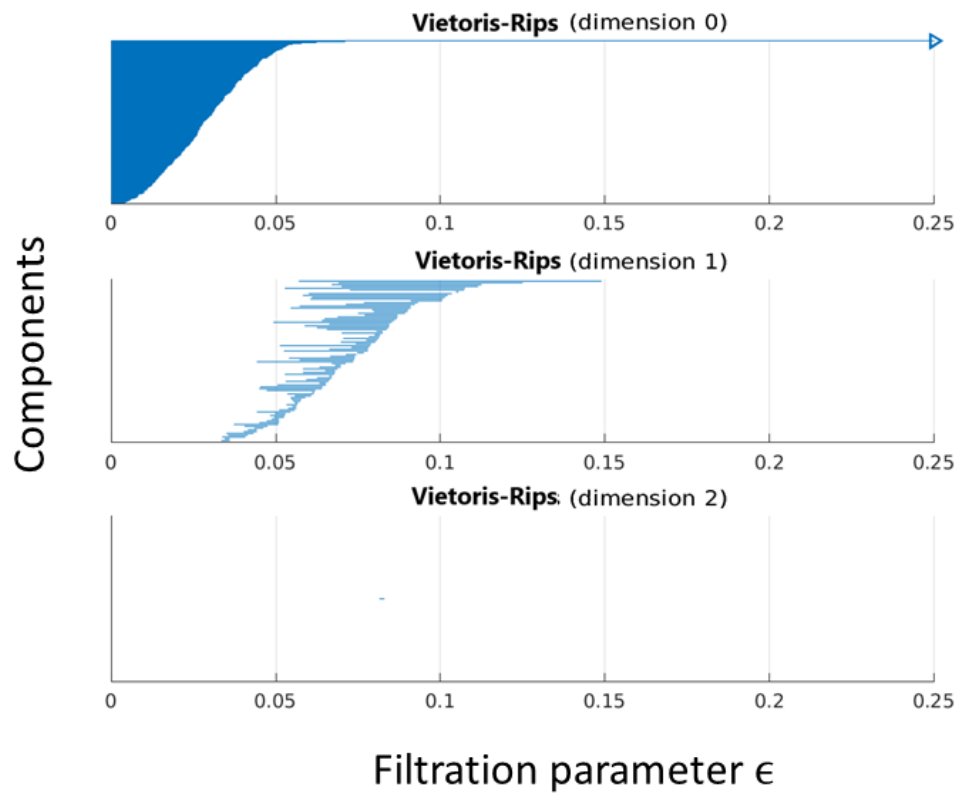

B2

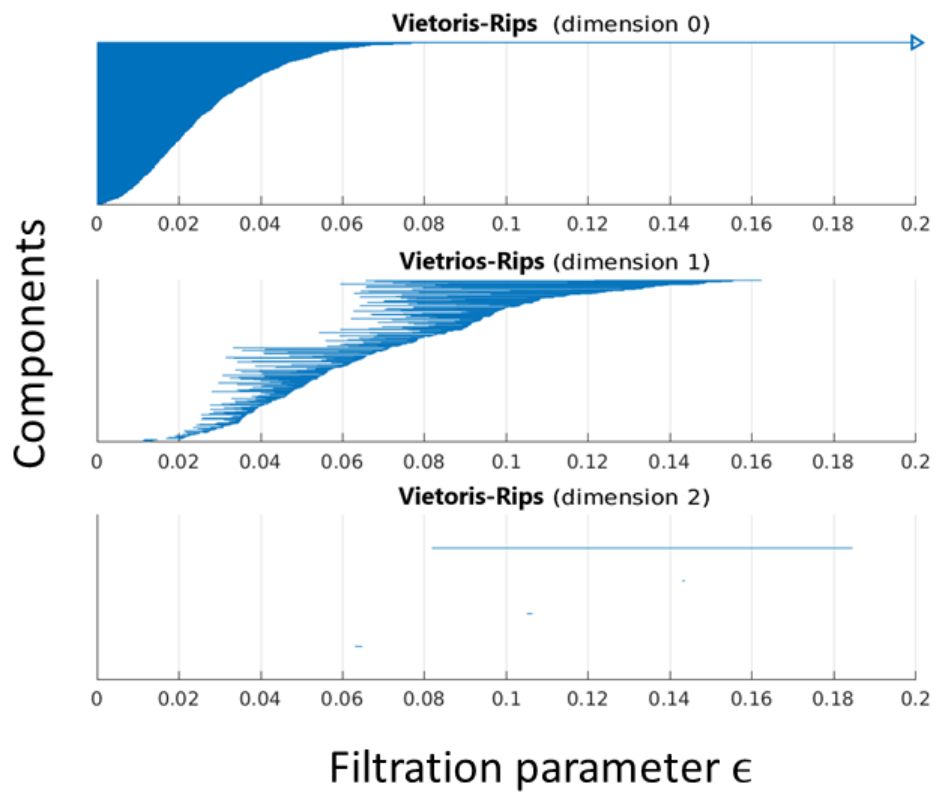

B3

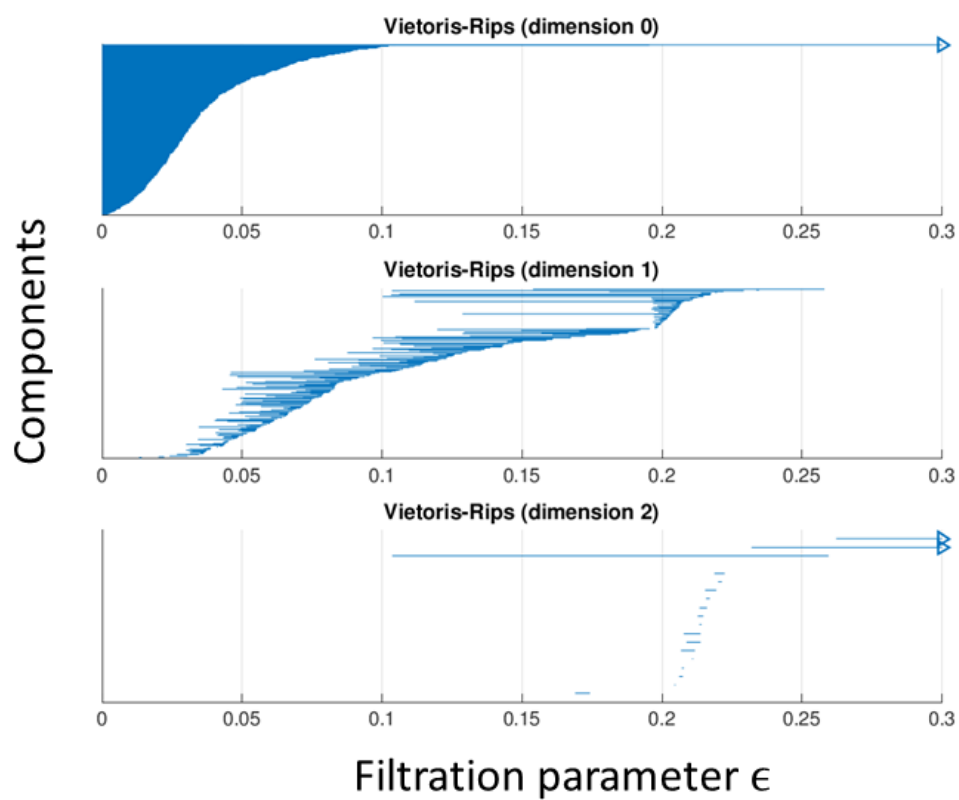

B4

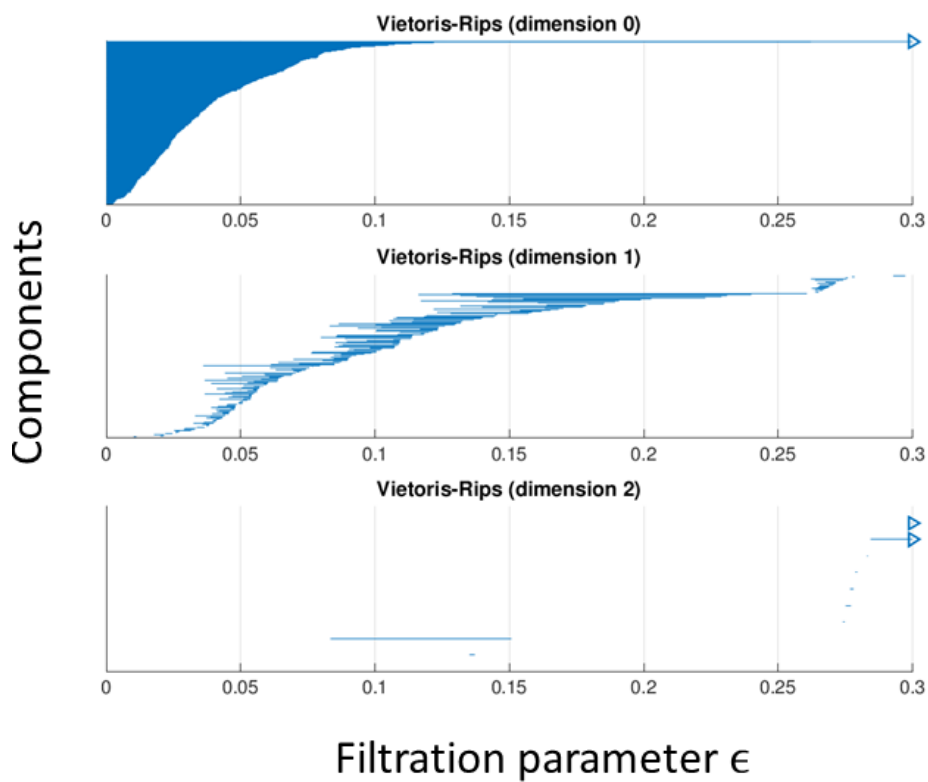

C1

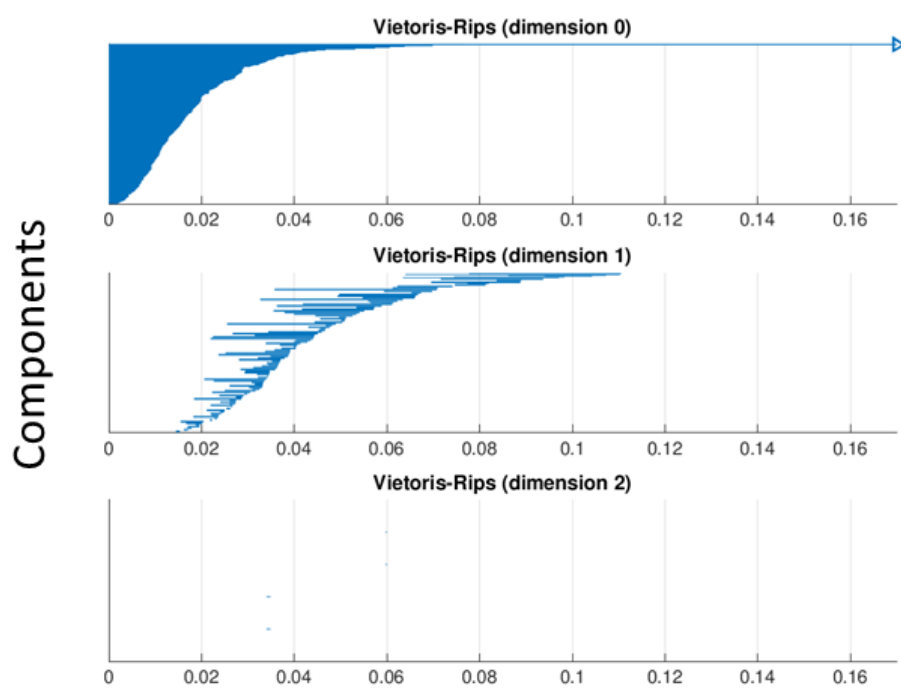

Filtration parameter  $\epsilon$

C2

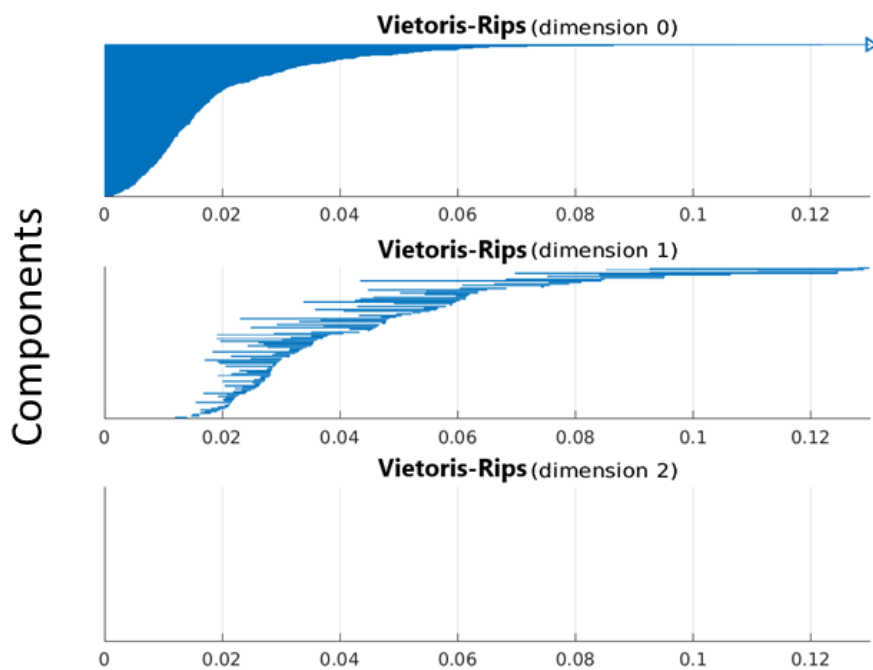

Filtration parameter  $\epsilon$

C3

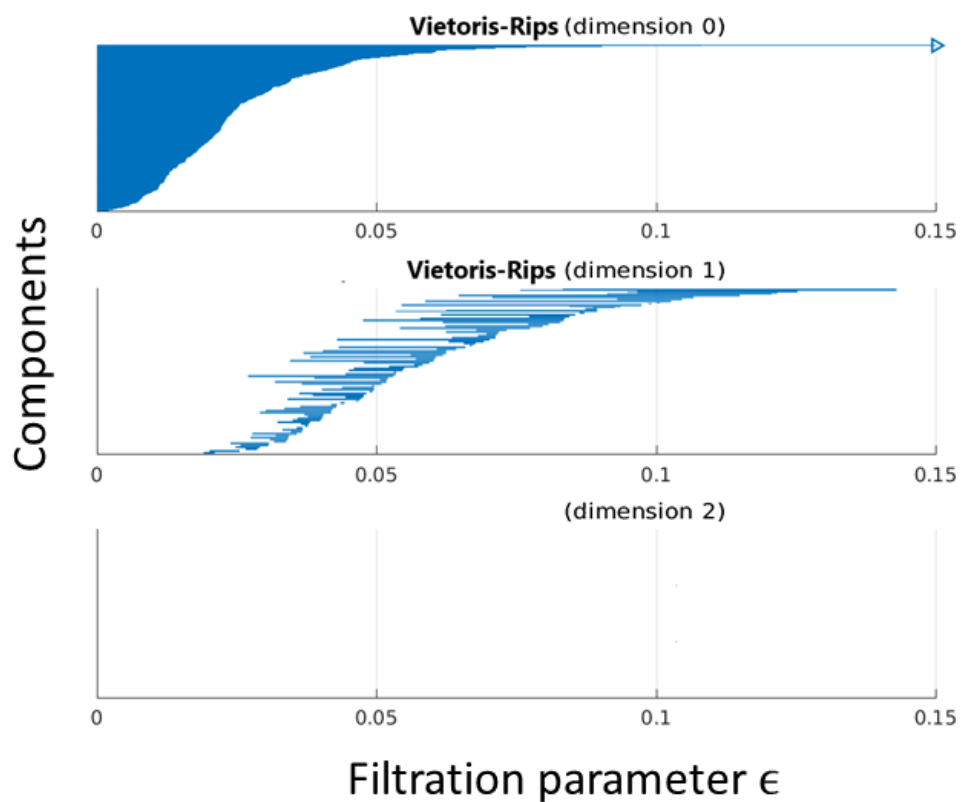

C4

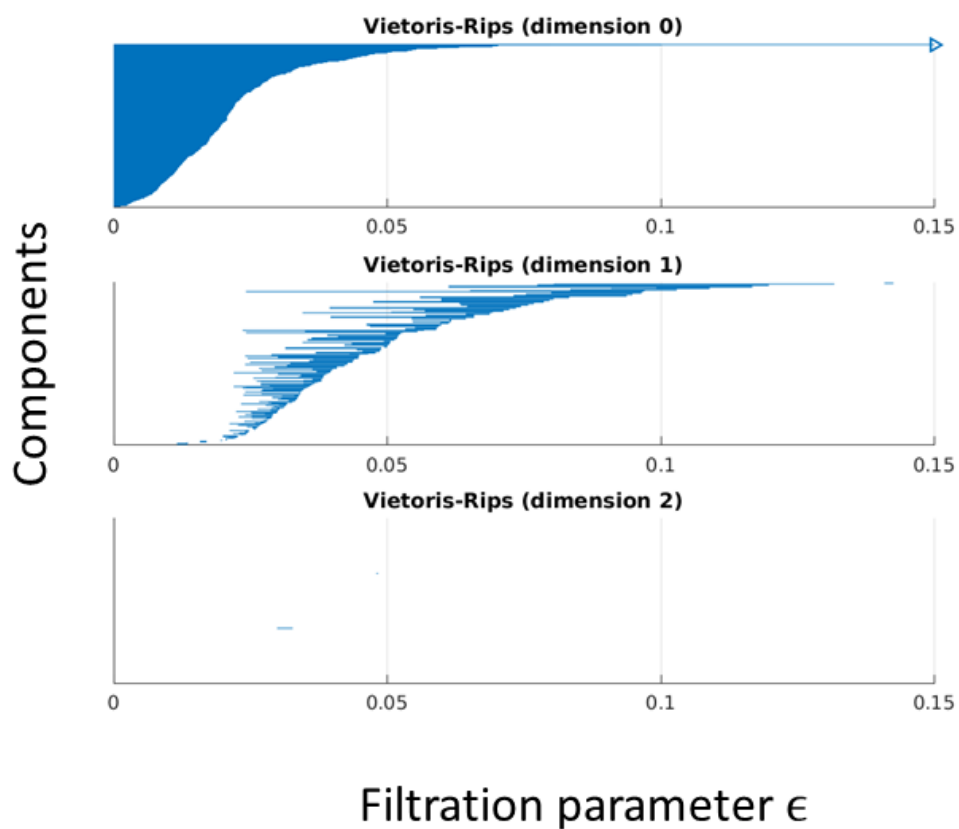

D1

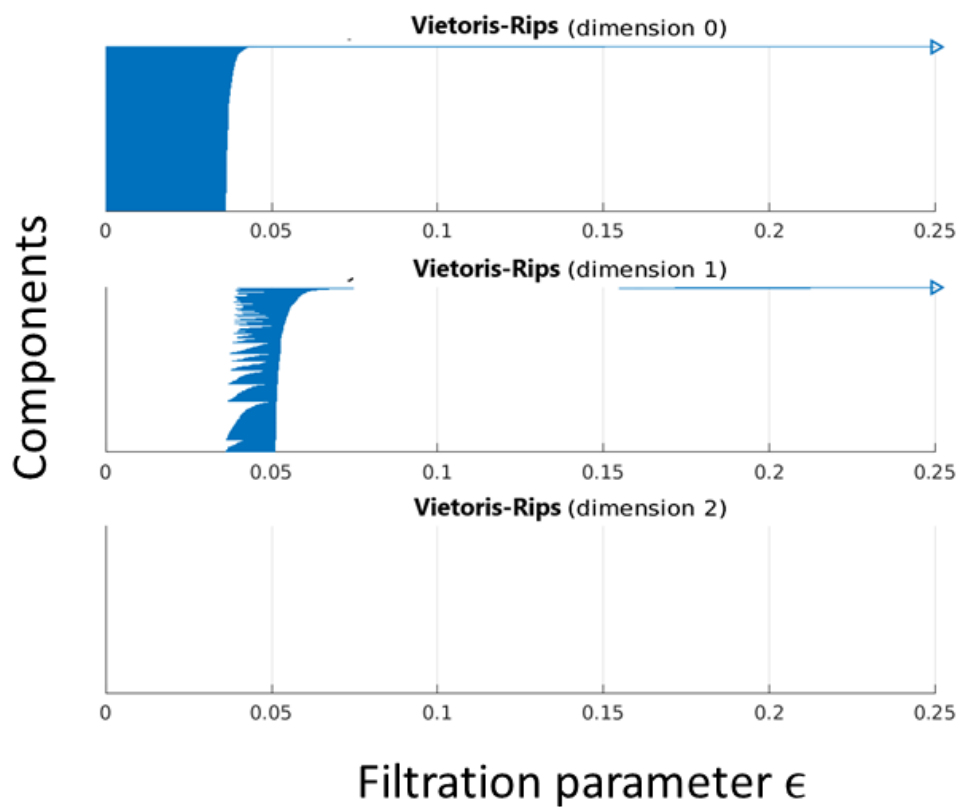

D2

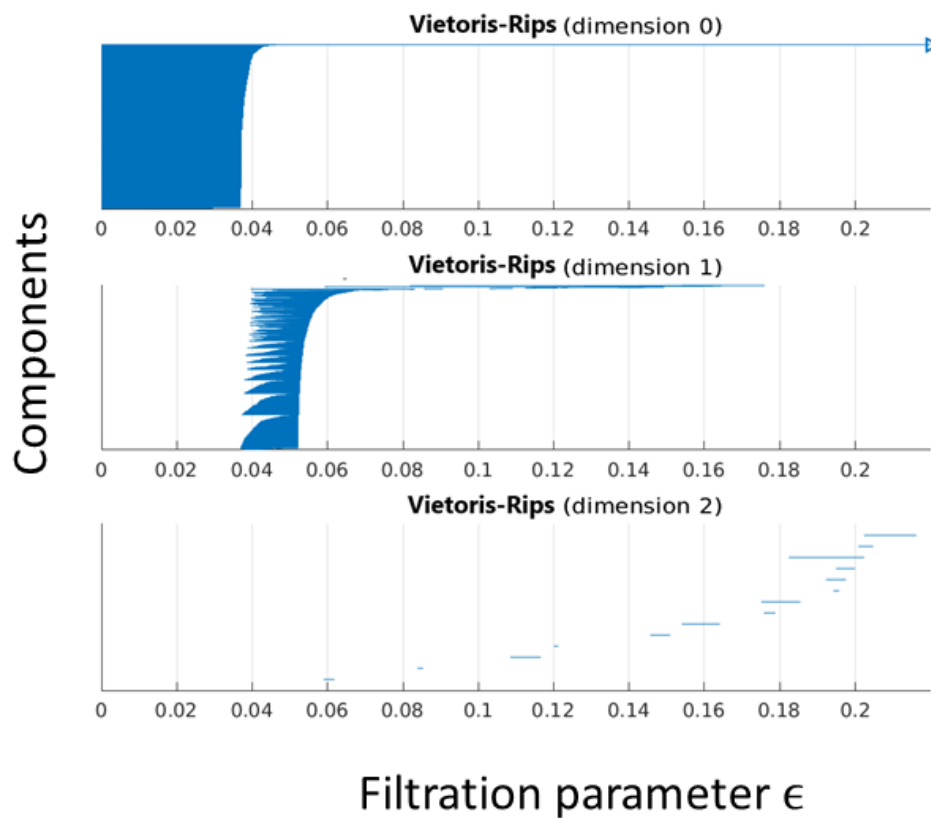

D3

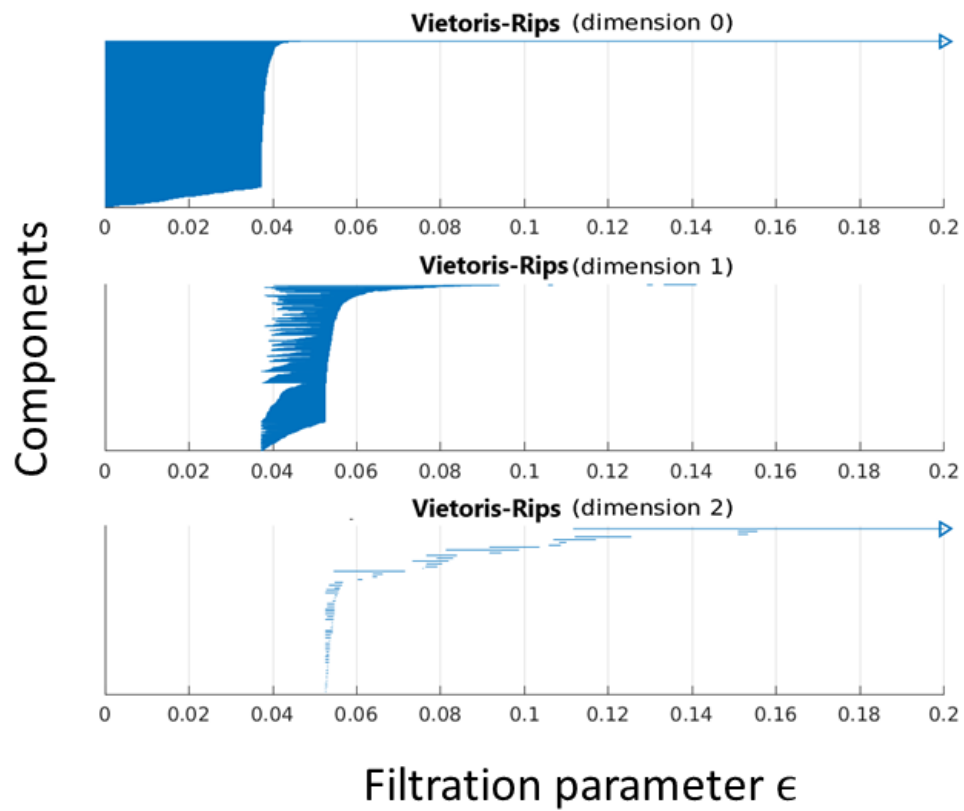

D4

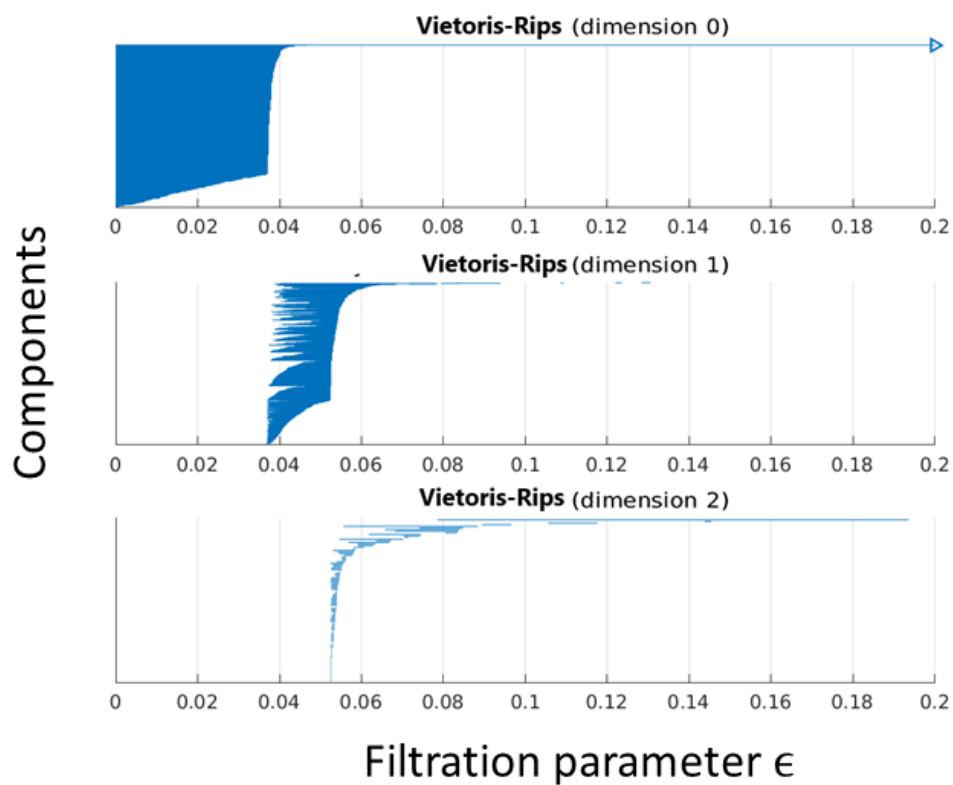



**Supplementary Figure S1.** The barcodes of the 16 fusion mechanisms.

01082019 - 31012020

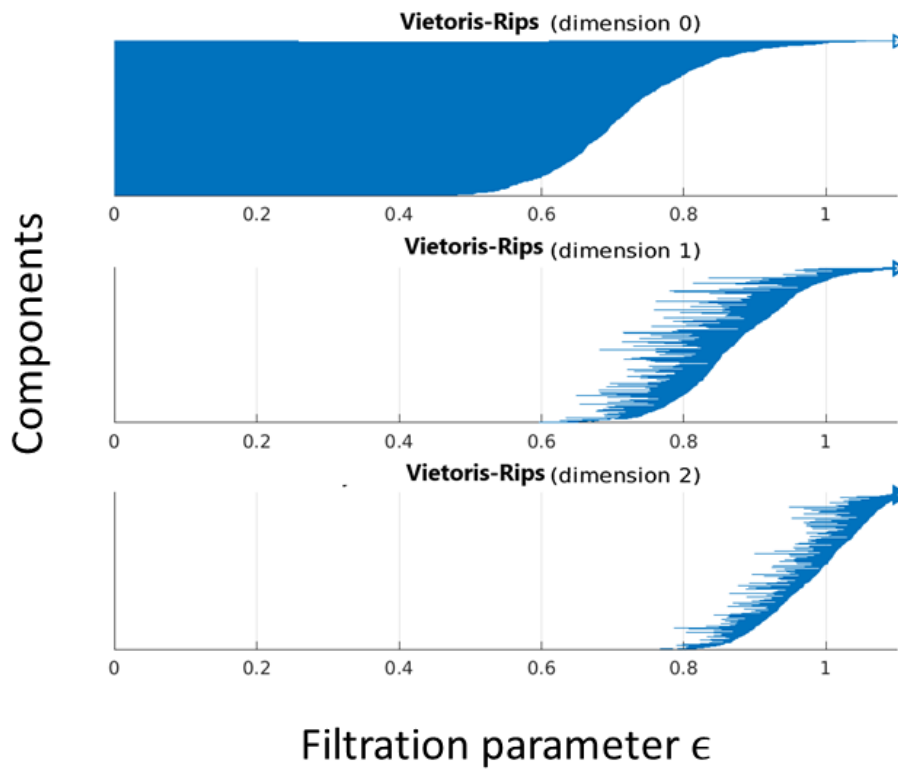

08082019 - 08022020

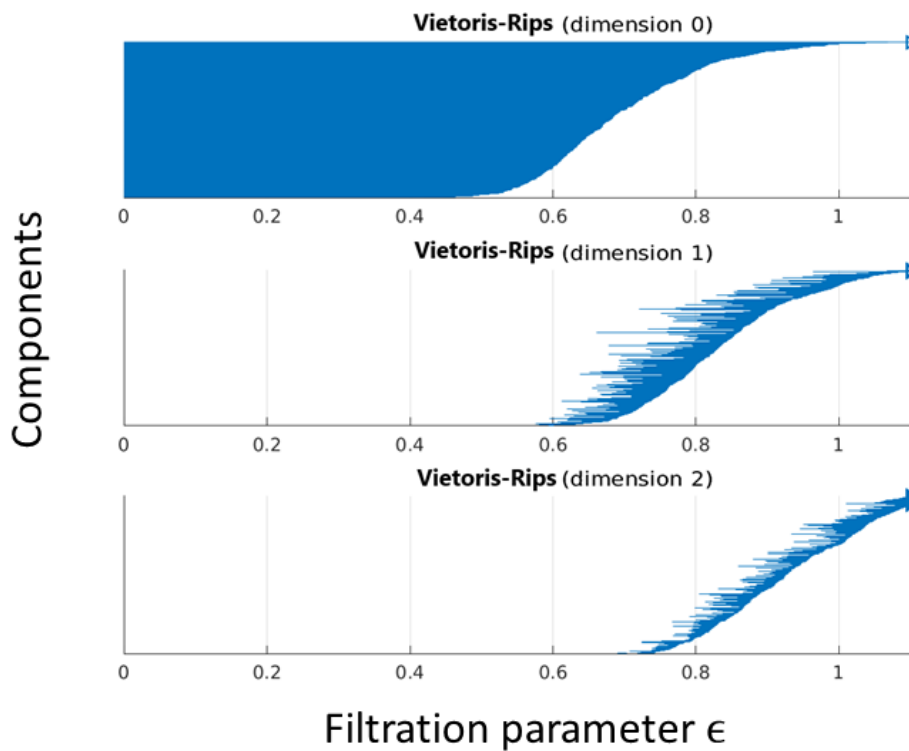

15082019 –15022020

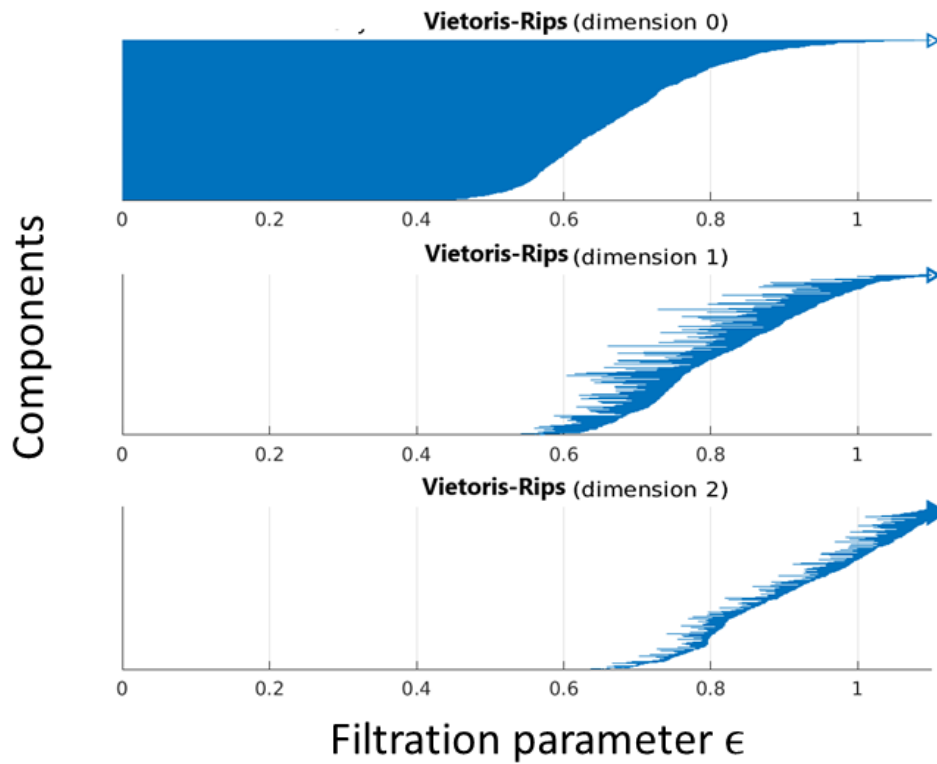

22082019 –22022020

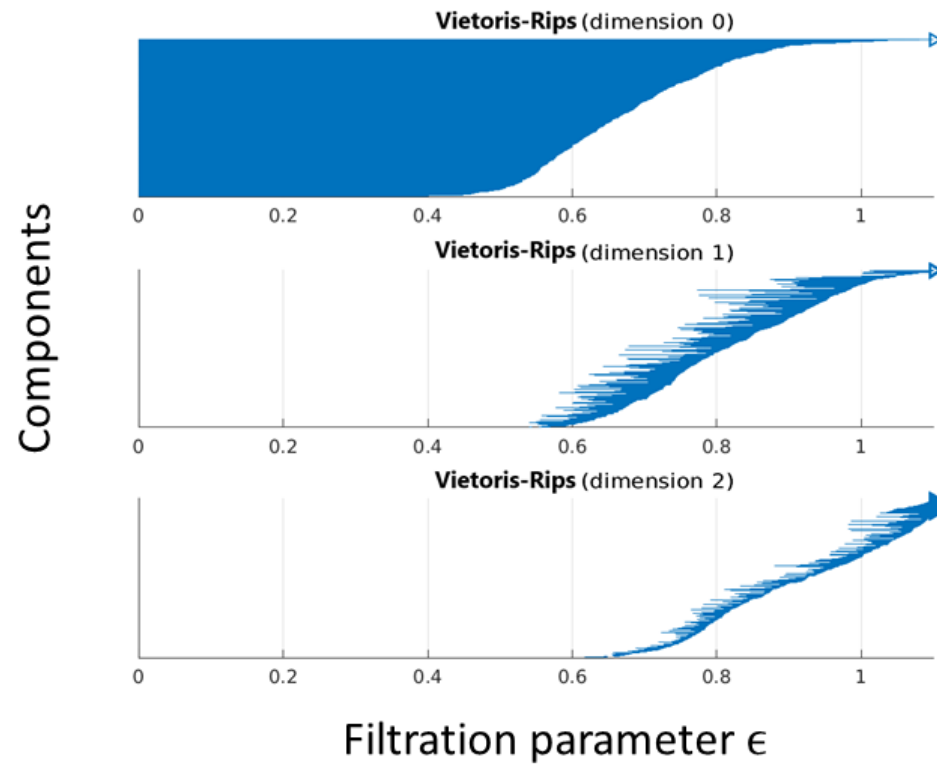

01092019 –01032020

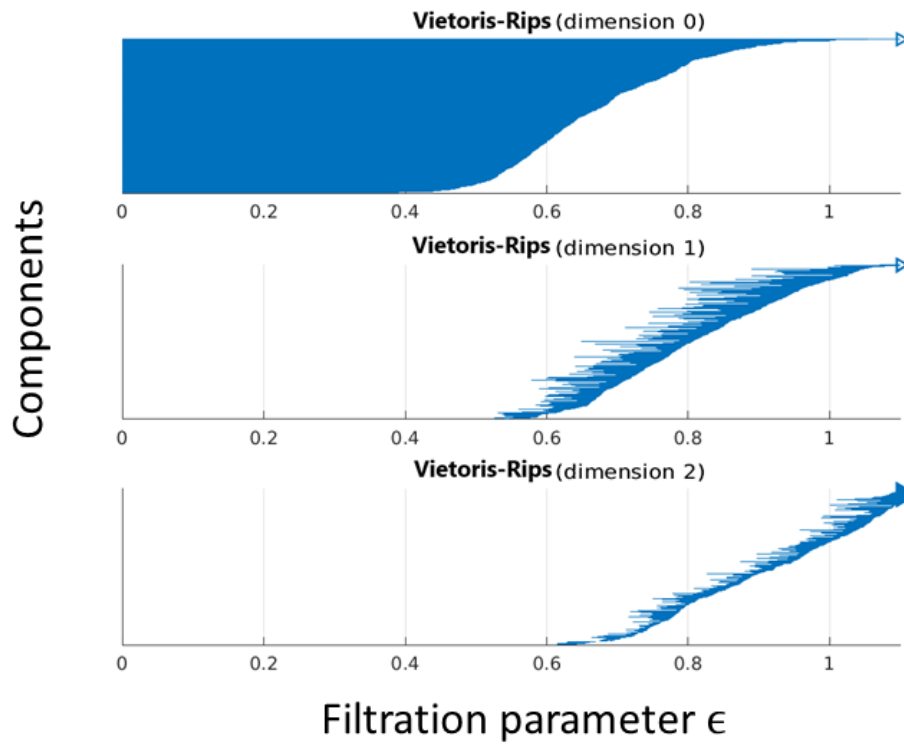

08092019 –08032020

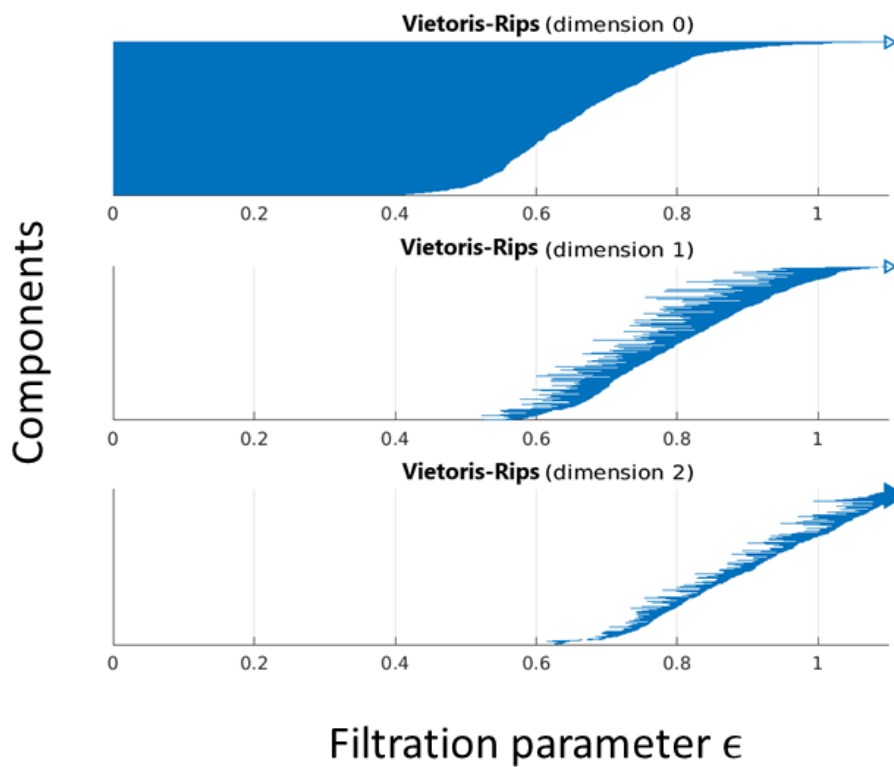

15092019 –15032020

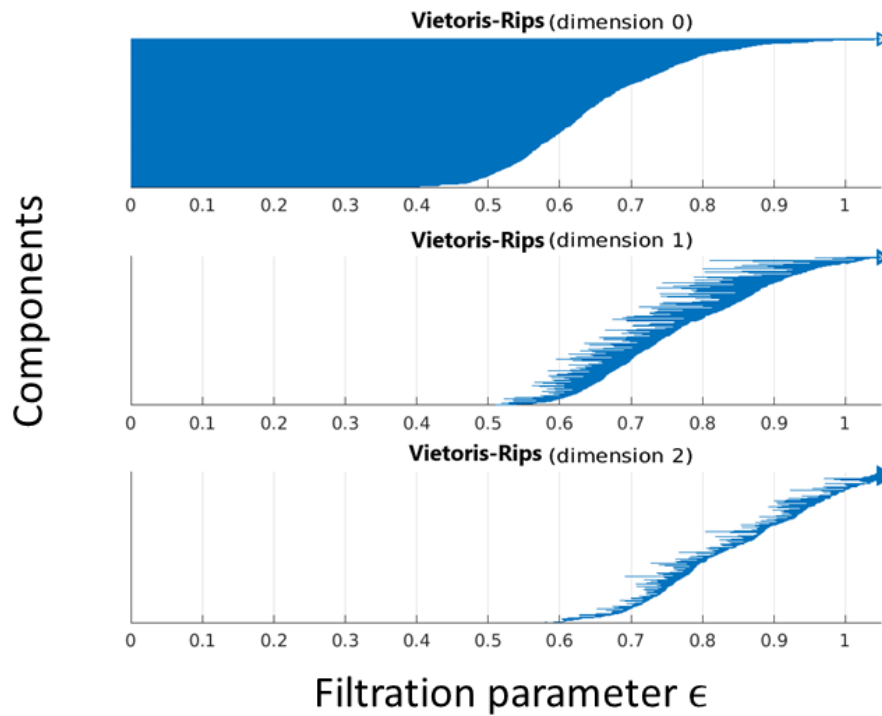

22092019 –22032020

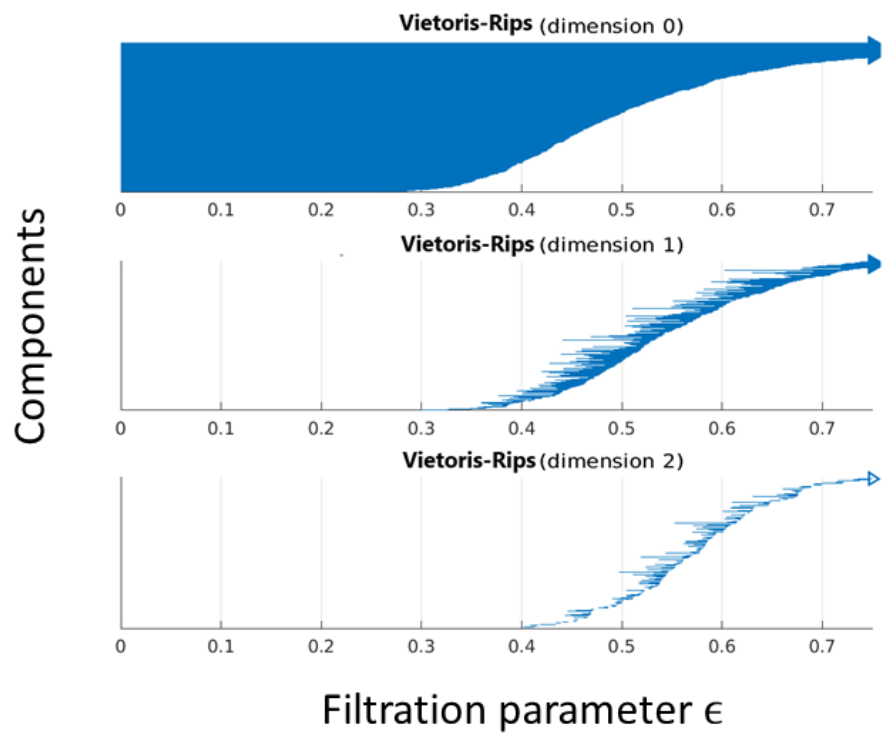

01102019 –31032020

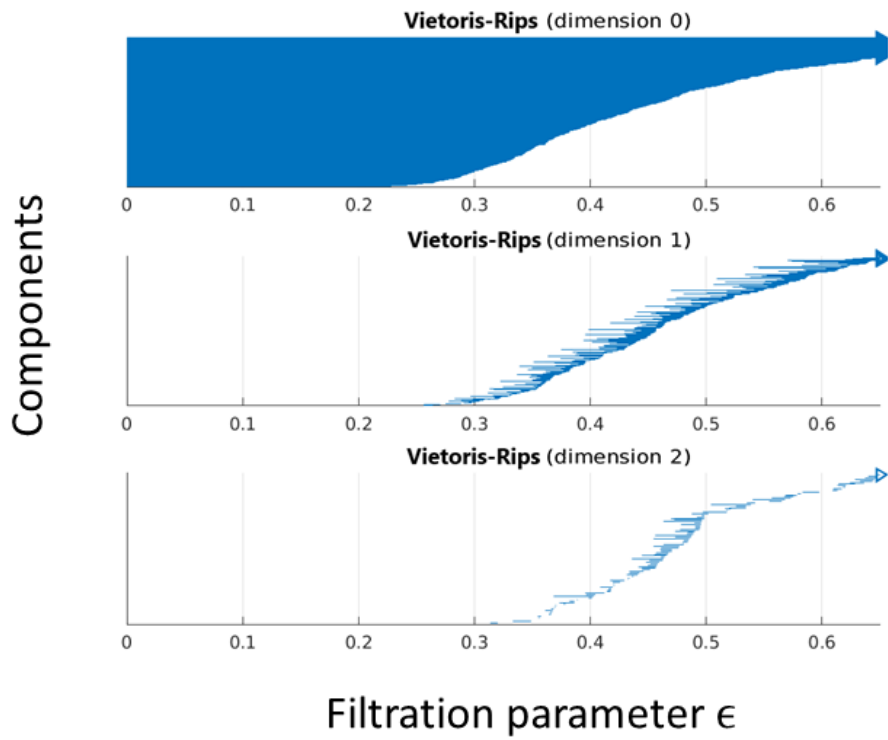

**Supplementary Figure S2.** The barcodes of the nine periods from 1 August 2019 to 31 March 2020 of TWSE.
